# Supplementary material for: Audio-/Videorecording Clinic Visits for Patient’s Personal Use in the United States: Cross-Sectional Survey
Source: PubMed Central journal article supplement (PMC6231772; doi:10.2196/11308), 2018-09-12
Supplement: jmir_v20i9e11308_app4.pdf [file jmir_v20i9e11308_app4.pdf]

Supplemental Table 1. Forty-nine of the largest healthcare organizations in the USA, listed by number of clinicians given in the AHRQ Compendium of US Health Systems

| <b>Name of system</b>                                                         | <b>State</b> | <b>Teaching Hospital(s)</b> | <b>Number of clinicians</b> | <b>% Primary Care Clinicians</b> |
|-------------------------------------------------------------------------------|--------------|-----------------------------|-----------------------------|----------------------------------|
| Kaiser Permanente                                                             | CA           | Yes                         | 20300                       | 44%                              |
| Sutter Health                                                                 | CA           | Yes                         | 10610                       | 16%                              |
| Ascension Health                                                              | MO           | Yes                         | 10502                       | 37%                              |
| Trinity Health                                                                | MI           | Yes                         | 8790                        | 38%                              |
| Providence Health and Services                                                | WA           | Yes                         | 8640                        | 35%                              |
| University of California Office of the President Health Sciences and Services | CA           | Yes                         | 7402                        | 25%                              |
| Partners HealthCare System, Inc                                               | MA           | Yes                         | 7368                        | 20%                              |
| Tenet Healthcare Corporation                                                  | TX           | Yes                         | 6297                        | 25%                              |
| Mayo Clinic                                                                   | MN           | Yes                         | 6127                        | 25%                              |
| Catholic Health Initiatives                                                   | CO           | Yes                         | 5422                        | 36%                              |
| MedStar Health                                                                | MD           | Yes                         | 4786                        | 18%                              |
| Texas Health Resources                                                        | TX           | No                          | 4779                        | 24%                              |
| Community Health Systems, Inc                                                 | TN           | Yes                         | 4283                        | 37%                              |
| The Cleveland Clinic Health System                                            | OH           | Yes                         | 4256                        | 26%                              |
| Northwell Health                                                              | NY           | Yes                         | 3721                        | 24%                              |
| UPMC                                                                          | PA           | Yes                         | 3610                        | 27%                              |
| Mount Sinai Health System                                                     | NY           | Yes                         | 3587                        | 24%                              |
| University of Pennsylvania Health System                                      | PA           | Yes                         | 3426                        | 22%                              |
| New York Presbyterian Healthcare System                                       | NY           | Yes                         | 3394                        | 25%                              |
| Carolinas HealthCare System                                                   | NC           | Yes                         | 3339                        | 40%                              |
| UW Medicine                                                                   | WA           | Yes                         | 3164                        | 23%                              |
| New York City Health and Hospitals Corporation                                | NY           | Yes                         | 3105                        | 37%                              |
| Banner Health                                                                 | AZ           | No                          | 3003                        | 35%                              |
| University of Michigan Health System                                          | MI           | Yes                         | 2795                        | 22%                              |
| Baylor Scott and White Health                                                 | TX           | Yes                         | 2743                        | 37%                              |
| SSM Health                                                                    | MO           | Yes                         | 2608                        | 34%                              |
| Henry Ford Health System                                                      | MI           | Yes                         | 2591                        | 26%                              |
| Johns Hopkins Health System                                                   | MD           | Yes                         | 2549                        | 30%                              |
| Mercy Health                                                                  | MO           | Yes                         | 2540                        | 33%                              |
| Advocate Health Care                                                          | IL           | Yes                         | 2496                        | 40%                              |
| Indiana University Health                                                     | IN           | Yes                         | 2484                        | 31%                              |
| Dignity                                                                       | CA           | Yes                         | 2403                        | 36%                              |
| Montefiore Medical Center                                                     | NY           | Yes                         | 2386                        | 34%                              |

Supplemental Table 1. Cont'd

| <b>Name of system</b> | <b>State</b> | <b>Teaching Hospital(s)</b> | <b>Number of clinicians</b> | <b>% Primary Care Clinicians</b> |
|-----------------------|--------------|-----------------------------|-----------------------------|----------------------------------|
|-----------------------|--------------|-----------------------------|-----------------------------|----------------------------------|

|                                       |    |     |      |     |
|---------------------------------------|----|-----|------|-----|
| University of Maryland Medical System | MD | Yes | 2027 | 26% |
| BJC HealthCare                        | MO | Yes | 2021 | 29% |
| Universal Health Services, Inc        | PA | Yes | 1989 | 23% |
| Adventist Health System               | FL | No  | 1891 | 39% |
| Beaumont Health Systems               | MI | Yes | 1818 | 33% |
| PeaceHealth                           | WA | No  | 1751 | 37% |
| LifePoint Health                      | TN | No  | 1699 | 39% |
| RWJBarnabas Health                    | NJ | Yes | 1590 | 29% |
| Novant Health, Inc                    | NC | No  | 1461 | 46% |
| CHRISTUS Health                       | TX | No  | 1444 | 33% |
| Mercy Health                          | OH | Yes | 1423 | 40% |
| Prime Healthcare Services, Inc        | CA | Yes | 1336 | 24% |
| Presence Health                       | IL | Yes | 1153 | 40% |
| Hospital Corporation of America, Inc* | -- | --  | --   | --  |
| Veterans Health Administration*       | -- | --  | --   | --  |
| TRICARE Regional Office North*        | -- | --  | --   | --  |

\*Indicates large systems that are included in HCOS but not included in the AHRQ Compendium of US Health Systems because they do not fit the AHRQ working definition of a health system, e.g. they do not include a medical group, or do not have at least one non-Federal general acute care hospital
